# Supplementary material for: ATP1A3 mutations can cause progressive auditory neuropathy: a new gene of auditory synaptopathy
Source: PubMed Central journal article supplement (PMC5705773; doi:10.1038/s41598-017-16676-9), 2017-11-28
Supplement: 41598_2017_16676_MOESM1_ESM.pdf [file 41598_2017_16676_MOESM1_ESM.pdf]

# ***ATPIA3* mutations can cause progressive auditory neuropathy: a new gene of auditory synaptopathy**

Kyu-Hee Han<sup>1</sup>, Doo-Yi Oh<sup>2</sup>, Seungmin Lee<sup>2</sup>, Chung Lee<sup>3,4</sup>, Jin Hee Han<sup>2</sup>, Min Young Kim<sup>2</sup>, Hye-Rim Park<sup>2</sup>, Moo Kyun Park<sup>5</sup>, Nayoung K.D. Kim<sup>3</sup>, Jaekwang Lee<sup>6</sup>, Eunyoung Yi<sup>7</sup>, Jong-Min Kim<sup>8</sup>, Jeong-Whun Kim<sup>2</sup>, Jong-Hee Chae<sup>9</sup>, Seung Ha Oh<sup>5</sup>, Woong-Yang Park<sup>3,4,10</sup>, Byung Yoon Choi<sup>2,\*</sup>

<sup>1</sup>Department of Otorhinolaryngology, National Medical Center, Seoul, Korea

<sup>2</sup>Department of Otorhinolaryngology, Seoul National University Bundang Hospital, Seongnam, Korea

<sup>3</sup>Samsung Genome Institute, Samsung Medical Center, Seoul, Korea

<sup>4</sup>Department of Health Sciences and Technology, Samsung Advanced Institute for Health Sciences and Technology, Sungkyunkwan University, Seoul, Korea

<sup>5</sup>Department of Otorhinolaryngology, Seoul National University Hospital, Seoul, Korea

<sup>6</sup>Division of Functional Food Research, Korea Food Research Institute (KFRI), Seongnam, Korea

<sup>7</sup>College of Pharmacy and Natural Medicine Research Institute, Mokpo National University, Muan, Korea

<sup>8</sup>Department of Neurology, Seoul National University Bundang Hospital, Seongnam, Korea

<sup>9</sup>Pediatric Clinical Neuroscience Center, Department of Pediatrics, Seoul National University Children's Hospital, Seoul, Korea

<sup>10</sup>Department of Molecular Cell Biology, School of Medicine, Sungkyunkwan University, Seoul, Korea

**\*Correspondence to:** Byung Yoon, Choi, MD, PhD

Department of Otorhinolaryngology, Seoul National University Bundang Hospital, 82 Gumi-ro 173 beon-gil, Bundang-gu, Seongnam 463-707, Republic of Korea

Email: choiby@snuh.org, choiby2010@gmail.com

Tel: +82-31-787-7406

Fax: +82-31-787-4057

## SUPPLEMENTARY INFORMATION

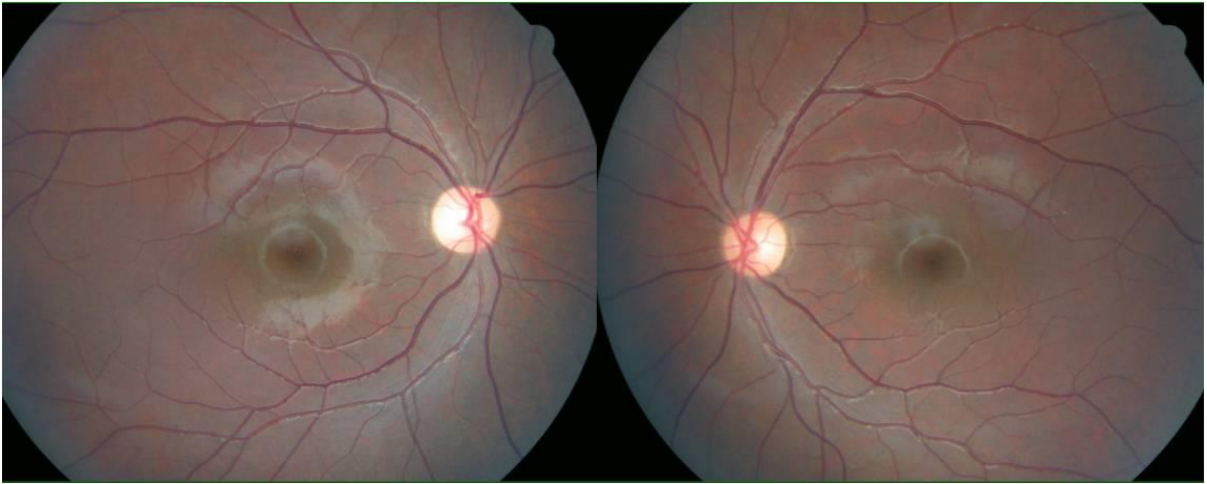

**Supplementary Figure S1. Fundus images of patient SH222-518** The color fundus photographs of right eye (left) and left eye (right) taken at age of six revealed mild temporal pallor in both eyes.

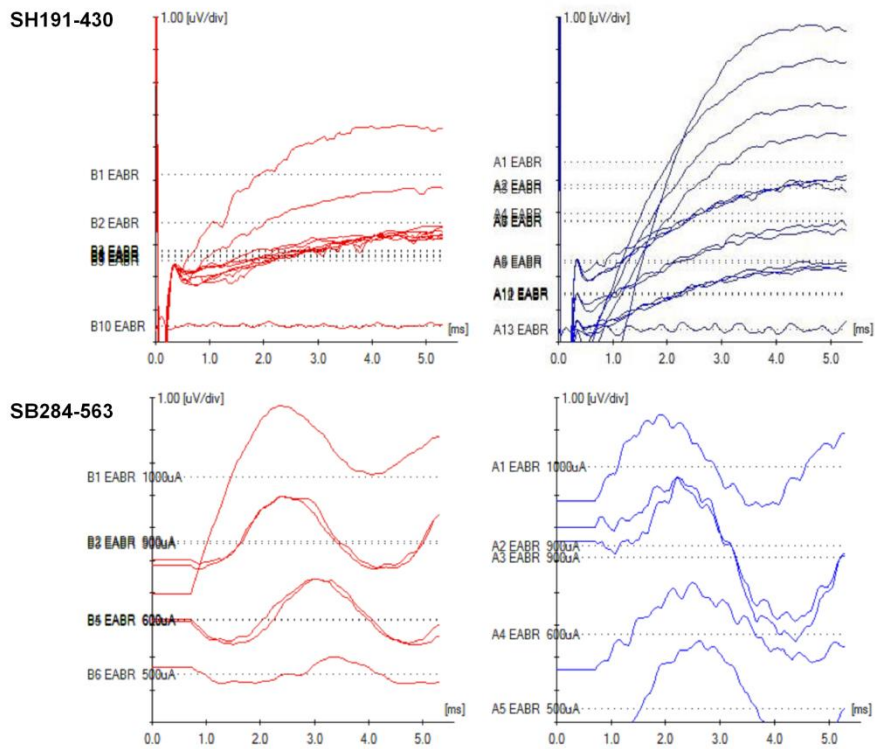

**Supplementary Figure S2. Preoperatively measured electrically evoked auditory brainstem response** Auditory brainstem response with trans-tympanic electrical stimulation presented reproducible waveforms bilaterally in two cochlear implantees (SH191-430 and SB 284-563).
